# Supplementary material for: A novel liver-specific fluorescent anti-cancer drug delivery system using indocyanine green
Source: PubMed Central journal article supplement (PMC6395603; doi:10.1038/s41598-019-39269-0), 2019-02-28
Supplement: 41598_2019_39269_MOESM1_ESM.pdf [file 41598_2019_39269_MOESM1_ESM.pdf]

## Supplementary information

### **A novel liver-specific fluorescent anti-cancer drug delivery system using indocyanine green**

Yoshinori Inagaki<sup>1,\*</sup>, Takashi Kokudo<sup>1,\*</sup>, Mako Kamiya<sup>2</sup>, Shin-nosuke Uno<sup>2</sup>, Masumitsu Sato<sup>1</sup>, Junichi Kaneko<sup>1</sup>, Norihiro Kokudo<sup>1</sup>, Yasuteru Urano<sup>2</sup>, Kiyoshi Hasegawa<sup>1</sup>

<sup>1</sup>Hepato-Biliary-Pancreatic Surgery Division and Artificial Organ and Transplantation Division, Department of Surgery, Graduate School of Medicine, The University of Tokyo

<sup>2</sup>Laboratory of Chemical Biology & Molecular Imaging, Graduate School of Medicine, The University of Tokyo

\* Authors share co-first authorship.

Corresponding author: Kiyoshi Hasegawa

Address: 7-3-1 Hongo, Bunkyo-ku, Tokyo 113-8655, Japan.

Tel: +81 338155411; fax: +81 356843989

E-mail address: kihase-ky@umin.ac.jp

**A**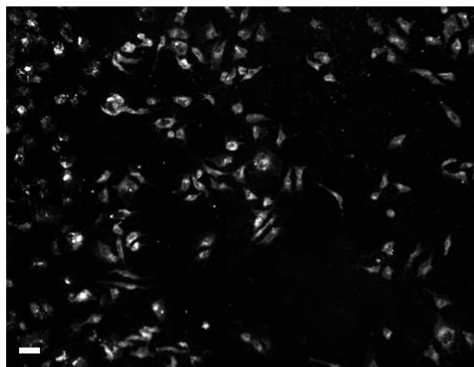**B**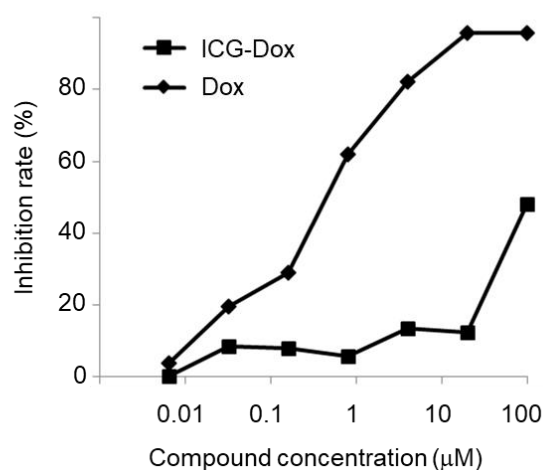

**Supplementary Figure 1. Effect of an indocyanine green (ICG)-conjugated doxorubicin (ICG-Dox) *in vitro*.** (A) Fluorescent image (x100) of hepatocellular carcinoma (HCC) cells 24 h after exposure to ICG-Dox. Scale bar = 50 μm. (B) An MTT assay of HuH-7 cells 24 h after exposure to ICG-Dox or Dox.

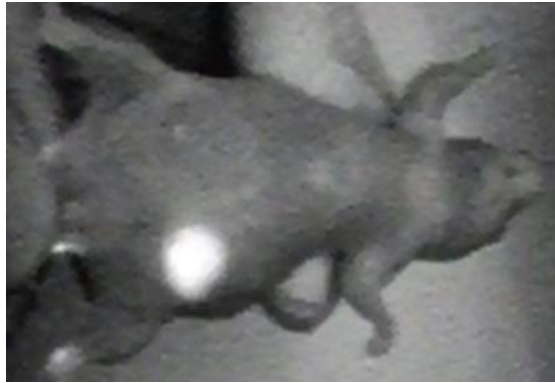

**Supplementary Figure 2. Distribution of indocyanine green (ICG) *in vivo*.**  
Fluorescent image of ICG *in vivo* 24 h after intravenous administration.
